# Supplementary material
Source: Royal Society of Chemistry journal article supplement (https://www.rsc.org/suppdata/cc/1999/2351/907237c.doc)
Supplement: Supplementary file 1 [file 907237c.doc]

**Supplementary Data**

for

**Sterically induced transmutations in cobalt amine chemistry**

**Rodney J. Geue, C. Jin Qin, Stephen F. Ralph, Brian W. Skelton, Alan M. Sargeson, Allan H. White, Anthony C. Willis.**

**Supplementary cyclic voltammogram**

Cyclic voltammogram for [CoII(Me8-tricosaneN6)]Cl2.3H2O (10-3M) in 0.1M KCl (H2O,N2 saturated) at 20 ˚C. (Glassy carbon working electrode, saturated calomel reference SCE, scan rate 100 mVs-1.)

**Supplementary NMR data for 1 and 3**

13C{1H} NMR of **1** (D2O): (ppm, 1,4-dioxane at 67.4) 20.9, 21.3, 24.4, 24.5, 38.4, 39.7, 40.2, 58.5, 61.2, 69.9, 192.9. 1H NMR of **3** (D2O, 25 ∞C): (ppm, HOD at 5.06) –12.31 (*D*3), –13.02, –21.68. –22.56 (*D*3 + *C*2) –24.74 (*D*3), –27.11, –30.34 (d or t), –32.25, –33.18, –33.75, –35.42 (*D*3), –36.08, –38.29, –41.67 (*D*3), –42.72, –43.66, –45.09, –45.6, –46.19 (*D*3), –47.11.

**Supplementary crystal data for 1 and 3**

*Crystal data* for **1**: C25H48Cl6CoN6Zn1.5.3.25H2O, monoclinic, *C*2/*c*, *a* = 27.260(2), *b* = 18.786(16), *c* = 17.707(4)Å,  = 122.53(1)∞, *V* = 7645 Å3, *Z* = 8, *D*c = 1.50 g cm-3, (Mo-K) = 17.4 cm-1, 3531 reflections with *I* > 3(*I*), 2max = 45∞, final *R* = 0.056. For **3** (NO3)2: C25H54CoN8O6.H2O, monoclinic, *C*2/*c*, *a* = 10.442(3), *b* = 17.347(6), *c* = 17.830(5)Å,  = 105.31(2)∞, *V* = 3115(2)Å3, *Z* = 4, *D*c = 1.364 g cm-3, (MoK) = 6.06 cm-1, 1296 reflections with *I* > 3(*I*), 2max = 45∞, final *R* = 0.044. For **3** (ZnCl4): C25H54Cl4CoN6Zn, orthorhombic, *Pbcn*, *a* = 10.733(4), *b* = 19.038(4), *c* = 15.678(4)Å, *V* = 3203(2)Å3, *Z* = 4, *D*c = 1.461 g cm-3, (MoK) = 16.26 cm-1, 1609 reflections with *I* > 3 (*I*), 2max = 50∞, final *R* = 0.034. Intensity data were collected at 295 K on Enraf-Nonius CAD-4, Phillips PW-1100/20 and Rigaku AFC6S diffractometers respectively, using graphite monochromated Mo-K radiation and were corrected for absorption. The structures were solved by direct methods and difference Fourier techniques and refined by full-matrix least-squares. All non-hydrogen atoms were refined with anisotropic displacement factors. Generally hydrogen atoms were placed at calculated positions and either not refined or periodically recalculated, but those attached to the nitrogen atoms of **3** were refined positionally.
